# Supplementary material for: Bending-Twisting Motions and Main Interactions in Nucleoplasmin Nuclear Import
Source: PubMed Central journal article supplement (PMC4892583; doi:10.1371/journal.pone.0157162), 2016-06-03
Supplement: pone.0157162.s021.pdf [file pone.0157162.s021.pdf]

S5 Table. Radius of curvature and average angles for the crystallographic structures.

| <b>X-ray PDB ID</b> | <b>Radius of curvature (Å)</b> | <b>Average angle (°)</b> |
|---------------------|--------------------------------|--------------------------|
| 1pjm                | 30.993009873                   | 19.6785642989            |
| 1pjn                | 31.2163002693                  | 19.6892134803            |
| 3tpm                | 31.2949958837                  | 19.6517732094            |
| 3ukw                | 31.4596203567                  | 19.2809651455            |
| 3ukx                | 31.1706523738                  | 19.7180289396            |
| 3uky                | 31.2620465432                  | 19.6859686016            |
| 3ukz                | 31.5329175935                  | 19.5667871962            |
| 3ul1                | 30.959989878                   | 19.8467057138            |
| 3uvu                | 31.33650329                    | 19.573789442             |
